# Supplementary material for: Introducing Polyautoimmunity: Secondary Autoimmune Diseases No Longer Exist
Source: Autoimmune Dis. 2012 Feb 20;2012:254319. doi: 10.1155/2012/254319 (PMC3290803; doi:10.1155/2012/254319)
Supplement: Supplementary file 1 — This table contains the detailed results about systematic literature review up to 2011: 142 articles with 226 cases of MAS were reported. In the first page (second column) there is the corresponding author's name and following there are the columns with the abbreviation of the specific AD. In each row the symbol characterizes each one of the disease found per case. In the second page, there is the complete article's name and the link to Pubmed for each reference. [file 254319.f1.xlsx]

## Sheet: Table MAS Cases
	Supplementary Material: Cases of Multiple Autoimmune Syndrome reported up until september 2011.
Article Number	Reference	T1D	SLE	APS	RA	SS	MG	VAS	SSc	PMDM	IBD	PA	AITD	CD	JCA	VIT	BID	AIH	RePo	AAI	ITP	PsA	AS	SAR	AA	PF	HA	DAD	AG	Others
1	Horita M, et al.					¨			¨				¨				¨
2	Mohan MP, et al.										¨					¨									¨
3	Playas G, et al.						¨						¨			¨
4	Sastre-Garriga J, et al.	¨											¨			¨				¨								¨
4	Sastre-Garriga J, et al.												¨							¨					¨			¨
5	Donadio V, et al.	¨											¨															¨
6	West M, et al.		¨					¨										¨									¨
6	West M, et al.		¨						¨								¨	¨
7	Anaya JM, et al.		¨			¨		¨
8	Tirado-Sánchez A, et al.					¨							¨													¨
9	Grandhe NP, et al.	¨																							¨	¨
10	Müller FB, et al.		¨			¨			¨								¨
11	Marcet B, et al.					¨											¨									¨
12	Coutant G, et al.		¨										¨			¨											¨
13	Klisnick A, et al.	¨										¨	¨			¨
13	Klisnick A, et al.				¨								¨			¨
13	Klisnick A, et al.					¨							¨			¨
13	Klisnick A, et al.		¨										¨			¨
13	Klisnick A, et al.												¨			¨				¨
13	Klisnick A, et al.							¨					¨			¨	¨										¨
13	Klisnick A, et al.							¨					¨			¨											¨
13	Klisnick A, et al.				¨	¨							¨	¨		¨
13	Klisnick A, et al.		¨	¨									¨			¨
14	Suzuki C,et al.	¨										¨	¨			¨
15	Christiann F, et al.											¨	¨														¨
15	Christiann F, et al.					¨						¨	¨
16	Zonana MF, et al.		¨		¨		¨						¨
17	Miyamoto H, et al.					¨							¨				¨
18	Rahamim-Cohen D, et al.		¨			¨		¨					¨
19	Sage RE, et al.				¨	¨																					¨
20	Humbert P, et al.					¨	¨					¨	¨
20	Humbert P, et al.							¨								¨											¨
20	Humbert P, et al.					¨						¨					¨
21	Turkcapar N, et al.		¨		¨	¨			¨				¨
22	Radulescu D, et al.		¨		¨				¨	¨
23	Manfredi R.						¨				¨		¨
24	Toth C, et al.	¨					¨						¨
25	Ozaslan E.												¨	¨			¨	¨
26	Malik TA, et al.										¨						¨	¨
27	Caprai S, et al.													¨			¨	¨
28	Mirzaagha F, et al.													¨			¨	¨
29	Wielosz E, et al.		¨	¨		¨			¨								¨					¨
30	Inoue M, et al.						¨			¨			¨
31	Kohli RS, et al.												¨								¨									¨1
32	Sander LE, et al.										¨						¨	¨
33	Heurgue-Berlot A, et al.				¨												¨	¨
33	Heurgue-Berlot A, et al.												¨				¨	¨
34	Targonska-Stepniak B, et al.			¨													¨	¨
35	Nakamura T, et al.					¨			¨				¨				¨
36	Gonzalez LA, et al.		¨														¨	¨
37	Toyoda M, et al.		¨														¨	¨			¨
38	Fichna M, et al.	¨											¨							¨
38	Fichna M, et al.												¨							¨									¨
38	Fichna M, et al.											¨	¨							¨									¨
38	Fichna M, et al.												¨							¨									¨	¨2
38	Fichna M, et al.												¨							¨										¨2
38	Fichna M, et al.	¨											¨							¨									¨
39	Ciolkiewicz M, et al.		¨	¨					¨
40	Dagdelen S, et al.	¨											¨	¨
41	Lis-Swiety A, et al.								¨	¨								¨						¨
42	Efe C, et al.								¨								¨	¨
42	Efe C, et al.		¨														¨	¨
42	Efe C, et al.					¨											¨	¨
43	Somers EC, et al.				¨								¨															¨
43	Somers EC, et al.	¨			¨								¨															¨
44	Triolo TM, et al.	¨												¨						¨
44	Triolo TM, et al.	¨											¨							¨
44	Triolo TM, et al.	¨											¨	¨
44	Triolo TM, et al.	¨											¨	¨						¨
45	Gentile M, et al.												¨				¨	¨									¨
46	Pelletier-Morel L, et al.	¨											¨																¨	¨3
47	Latif S, et al.		¨										¨	¨
48	Carneriro M, et al.	¨										¨	¨																¨
49	Frohlich-Reiterer EE, et al.	¨											¨	¨
50	Nagy KH, et al.	¨											¨		¨
51	Bas F, et al	¨											¨	¨
52	Amerio P, et al.												¨			¨									¨
52	Amerio P, et al.												¨			¨													¨
53	Kobayashi M, et al.	¨										¨	¨
54	Schreiber FS, et al.	¨											¨	¨
55	Hrubiskova K, et al.												¨	¨						¨
56	Furuichi M, et al.												¨				¨									¨
57	Zhang ZL, et al.		¨			¨														¨
57	Zhang ZL, et al.			¨																¨			¨
58	Staropoli JF, et a.		¨	¨																							¨
59	Sadnicka A, et al.						¨																							¨4
60	Mori A, et al.			¨						¨																		¨
61	Romdhane H, et al.			¨							¨						¨
62	Takahashi M, et al.					¨			¨								¨											¨
63	Tristano AG, et al.		¨	¨																								¨
64	Provenzale J, et al.		¨							¨																		¨
65	Seitz PA, et al.		¨								¨																	¨
66	Campos LM, et al.		¨	¨																								¨
67	Ferreira S, et al.		¨	¨																								¨
68	Anantharaju A, et al.					¨											¨											¨
69	Wakatsuki T, et al.					¨											¨											¨
70	Rutan G, et al.					¨											¨											¨
71	Wesemann DR, et al.		¨	¨																				¨
72	Khaled A, et al.																	¨			¨					¨	¨
73	Gupta D, et al.		¨	¨										¨
74	Zubrzycka-Sienkiewicz A, et al.		¨	¨						¨
75	O'Sullivan SS, et al.		¨				¨																		¨
76	Tsang CC, et al.											¨	¨							¨					¨
77	Sanchez de Rivera JM, et al.		¨						¨				¨
78	Hamilton DV.		¨									¨	¨
79	Denko JD.		¨			¨							¨
80	Trapp RG, et al.		¨			¨							¨
81	Chowdhury SR, et al.		¨	¨	¨
82	Ford AL, et al.		¨			¨			¨
83	Alberti-Flor JJ, et al.	¨	¨														¨
84	Nakayama S, et al.		¨															¨						¨
85	Tola MR, et al.		¨				¨																					¨
86	Grinlinton FM, et al.		¨				¨						¨
87	Kobayashi T, et al.		¨			¨							¨									¨
88	Grupper C, et al.		¨						¨	¨
89	Stevens HP, et al.		¨	¨							¨						¨
90	Cabanillas Núñez Y, et al.		¨			¨											¨
91	Roux M, et al.		¨	¨															¨
92	Mascaró JM Jr, et al.		¨							¨																¨
93	Smyth AE, et al.		¨	¨																								¨
94	Galofré J, et al.		¨			¨							¨
95	Peña AS.		¨			¨								¨							¨
96	Bouchou K, et al.		¨	¨									¨			¨		¨
97	Feld S, et al.		¨			¨						¨	¨														¨
98	Cañas C, et al.	¨	¨	¨									¨			¨
99	Lamas Robles C, et al.		¨						¨	¨
100	Cadena J, et al.		¨			¨		¨
101	Klumb EM, et al.		¨	¨				¨
102	Rojas-Villarraga A, et al.		¨	¨		¨
102	Rojas-Villarraga A, et al.		¨	¨		¨											¨
102	Rojas-Villarraga A, et al.		¨	¨		¨
102	Rojas-Villarraga A, et al.		¨								¨						¨	¨
102	Rojas-Villarraga A, et al.		¨			¨							¨
102	Rojas-Villarraga A, et al.		¨			¨							¨
102	Rojas-Villarraga A, et al.		¨	¨		¨
102	Rojas-Villarraga A, et al.		¨										¨				¨
102	Rojas-Villarraga A, et al.		¨			¨							¨
102	Rojas-Villarraga A, et al.		¨			¨							¨
102	Rojas-Villarraga A, et al.		¨			¨							¨
102	Rojas-Villarraga A, et al.		¨		¨								¨
102	Rojas-Villarraga A, et al.		¨						¨				¨
102	Rojas-Villarraga A, et al.		¨	¨		¨
102	Rojas-Villarraga A, et al.		¨		¨								¨
102	Rojas-Villarraga A, et al.		¨			¨							¨
102	Rojas-Villarraga A, et al.		¨	¨		¨							¨
102	Rojas-Villarraga A, et al.		¨	¨		¨							¨
102	Rojas-Villarraga A, et al.		¨		¨	¨
102	Rojas-Villarraga A, et al.		¨	¨		¨							¨
102	Rojas-Villarraga A, et al.		¨	¨		¨
102	Rojas-Villarraga A, et al.		¨			¨							¨
102	Rojas-Villarraga A, et al.		¨	¨									¨
102	Rojas-Villarraga A, et al.		¨	¨									¨
102	Rojas-Villarraga A, et al.		¨	¨		¨
102	Rojas-Villarraga A, et al.		¨			¨							¨
102	Rojas-Villarraga A, et al.		¨	¨																		¨
102	Rojas-Villarraga A, et al.		¨			¨							¨
102	Rojas-Villarraga A, et al.		¨				¨		¨													¨
102	Rojas-Villarraga A, et al.		¨			¨							¨
102	Rojas-Villarraga A, et al.	¨	¨										¨
102	Rojas-Villarraga A, et al.		¨			¨		¨					¨
102	Rojas-Villarraga A, et al.		¨	¨		¨	¨
102	Rojas-Villarraga A, et al.		¨			¨			¨
102	Rojas-Villarraga A, et al.		¨	¨									¨
102	Rojas-Villarraga A, et al.		¨	¨		¨
102	Rojas-Villarraga A, et al.		¨			¨							¨
102	Rojas-Villarraga A, et al.		¨	¨									¨
102	Rojas-Villarraga A, et al.		¨			¨							¨
102	Rojas-Villarraga A, et al.		¨	¨									¨
103	Hausmanowa-Petrusewicz I, et al.		¨				¨																			¨
104	Rodriguez-Reyna TS, et al.		¨						¨	¨
105	Saeki R, et al.			¨													¨	¨
106	Harati Y, et al.						¨			¨			¨
107	Nelson RP, et al.	¨											¨							¨
108	Cruz PD, et al.		¨				¨																			¨
109	Giardino G, et al												¨	¨							¨	¨			¨
109	Giardino G, et al	¨											¨	¨																¨5
109	Giardino G, et al	¨				¨							¨	¨
109	Giardino G, et al		¨										¨								¨
109	Giardino G, et al	¨											¨	¨
109	Giardino G, et al												¨	¨							¨
109	Giardino G, et al	¨											¨	¨
109	Giardino G, et al	¨														¨						¨
109	Giardino G, et al	¨											¨	¨	¨
109	Giardino G, et al	¨											¨	¨
109	Giardino G, et al	¨											¨	¨
110	Scofield RH, et al.		¨			¨							¨
111	Hatano T, et al.		¨			¨																						¨
112	Oosterhuis HJ, et al.		¨		¨		¨
113	Tanus T, et al.											¨				¨	¨												¨
114	Sheehan NJ, et al				¨	¨						¨	¨	¨							¨
115	Grennan D, et al.		¨			¨			¨
115	Grennan D, et al.					¨			¨	¨
115	Grennan D, et al.		¨		¨	¨
116	Akiyama Y, et al.		¨			¨			¨	¨
117	Kume A, et al.		¨			¨			¨
118	Kumagai I, et al.				¨				¨	¨
119	Otto-Buczkowska E, et al.	¨											¨	¨
120	Soyucen E, et al.	¨											¨	¨
121	Faesch S, et al.	¨											¨	¨
122	Werneck AL, et al.						¨		¨				¨
123	Czirják L, et al.					¨			¨								¨
124	Gendi N, et al.		¨		¨				¨
125	Hosoya N, et al.					¨			¨	¨														¨
126	Ito M, et al.				¨	¨			¨								¨
127	Akiyama Y, et al.					¨			¨								¨
128	Penmetcha M, et al.		¨	¨					¨
129	Nitta Y, et al.		¨						¨	¨
130	Koarada S, et al.					¨				¨														¨
131	Noval Menendez J, et al.		¨		¨	¨							¨
132	Kamei N, et al.								¨	¨			¨								¨
133	Szigeti N, et al.					¨			¨								¨
134	Andrews J, et al.								¨	¨																	¨
135	Ponyi A, et al.			¨	¨					¨
136	Arakawa Y, et al.												¨				¨	¨			¨
137	Humbert P, et al.					¨	¨					¨	¨
137	Humbert P, et al.												¨			¨					¨						¨
137	Humbert P, et al.					¨						¨	¨				¨			¨
137	Humbert P, et al.		¨										¨							¨
138	Pirofsky B, et al.											¨															¨		¨
138	Pirofsky B, et al.											¨	¨														¨		¨
138	Pirofsky B, et al.	¨										¨	¨																¨
138	Pirofsky B, et al.		¨									¨															¨
139	Lynfield YL, et al.				¨								¨								¨				¨	¨
140	Yeh S, et al.					¨							¨			¨						¨
141	Hamza S, et al.				¨	¨						¨
142	Katsanos KH, et al.					¨					¨						¨

## Sheet: References
Article Number	Title	Electronic reference number	Authors	Citation (link to database)
1	A case of primary biliary cirrhosis associated with Hashimoto's thyroiditis, scleroderma and Sjögren's syndrome		Horita M, Takahashi N, Seike M, Nasu S, Takaki R.	Intern Med. 1992 Mar;31(3):418-21
2	Multiple autoimmune syndrome		Mohan MP, Ramesh TC.	Indian J Dermatol Venereol Leprol. 2003 Jul-Aug;69(4):298-9
3	Miastenia Gravis con Poliendocrinopatía autoinmune		Pérez GP, Paredes JO, Casillas CE, Espinosa RA, Mora PC	http://imbiomed.com.mx/1/1/articulos.php?method=showDetail&id_articulo=13772&id_seccion=1131&id_ejemplar=1413&id_revista=91
4	Polyglandular autoimmune syndrome type II and multiple sclerosis		Sastre-Garriga J, Tintoré M, Montalban X.	J Neurol. 2001 Apr;248(4):330-1.
5	Multiple sclerosis-like disease in polyglandular autoimmune syndrome		Donadio V, Cortelli P, Liguori R, Di Stasi V, Montagna P.	J Neurol. 2001 Jan;248(1):61-2.
6	The development of connective tissue diseases in patients with autoimmune hepatitis: a case series		West M, Jasin HE, Medhekar S.	Semin Arthritis Rheum. 2006 Jun;35(6):344-8.
7	Multiple autoimmune disease in a patient with hyperprolactinemia		Anaya JM, Shoenfeld Y.	Isr Med Assoc J. 2005 Nov;7(11):740-1.
8	Coexistence of bullous pemphigoid, vitiligo, and thyroid disease: a multipleautoimmune syndrome?		Tirado-Sánchez A, Montes-de-Oca G.	Dermatol Online J. 2005 Aug 1;11(2):20
9	Multiple autoimmune syndrome in a patient with pemphigus vulgaris.		Grandhe NP, Dogra S, Kanwar AJ.	Acta Derm Venereol. 2005;85(1):91-2.
10	Multiple autoimmune syndrome. Reynolds-syndrome (acral scleroderma, primary biliary cirrhosis, Sjögren syndrome) associated with the lupus erythematosus/lichen planus overlap syndrome		Müller FB, Groth W, Mahrle G.	Hautarzt. 2004 May;55(5):465-70.
11	Bullous pemphigoid, primary biliary cirrhosis and vitiligo: a multiple autoimmune syndrome?		Marcet B, Sibaud V, Géniaux M, Taieb A.	Ann Med Interne (Paris). 2002 Sep;153(5):349-50.
12	Association of sarcoidosis and multiple autoimmune syndrome		Coutant G, Bechade D, Mayaudon H, Moulin O, Algayres JP.	Ann Med Interne (Paris). 2000 Oct;151(6):519-20.
13	Vitiligo in multiple autoimmune syndrome: a retrospective study of 11 cases and a review of the literature		Klisnick A, Schmidt J, Dupond JL, Bouchou K, Rousset H, Thieblot P, Humbert P, Vidal E, Aumaître O.	Rev Med Interne. 1998 May;19(5):348-52.
14	Slowly progressive type 1 diabetes mellitus associated with vitiligo vulgaris,chronic thyroiditis, and pernicious anemia		Suzuki C, Hirai Y, Terui K, Kohsaka A, Akagi T, Suda T.	Intern Med. 2004 Dec;43(12):1183-5.
15	2 cases of multiple autoimmune syndrome		Christiann F, Rayet P, Aouane F.	Rev Med Interne. 1998 Aug;19(8):580-1.
16	Coexistence of four autoimmune diseases in one patient: the kaleidoscope ofautoimmunity		Zonana MF, Reyes E, Weisman AK.	J Clin Rheumatol. 2002 Dec;8(6):322-5.
17	Interstitial pneumonia complicated by Sjögren's syndrome, Hashimoto's disease, rheumatoid arthritis and primary biliary cirrhosis		Miyamoto H, Azuma A, Taniguchi Y, Takahashi T, Yoshimura A, Hemmi S, Fukuda Y, Kudoh S.	Intern Med. 2000 Nov;39(11):970-5.
18	The mosaic of autoimmunity. A classical case of inhalation of a polyclonal activating factor in a genetically and hormonally susceptible patient leading to multiple autoimmune diseases		Rahamim-Cohen D, Shoenfeld Y.	Isr Med Assoc J. 2001 May;3(5):381-2.
19	A Case of Multiple Autoimmune Disease, Lymphoid Proliferation and Hypogammaglobulinaemia		Sage RE, Forbes IJ.	Blood. 1968 Apr;31(4):536-48
20	Multiple autoimmune síndromes (MAS)	5	Humbert P, Dupond JL.	Br J Dermatol. 1997 Mar;136(3):468-9.
21	A case of overlap syndrome with rheumatoid arthritis, systemic lupuserythematosus, systemic sclerosis and secondary Sjögren's syndrome		Turkcapar N, Olmez U, Ozer D, Duzgun N, Duman M.	Rheumatol Int. 2006 Jul;26(9):841-5
22	A rare case of systemic autoimmune disease with intricate features of systemic sclerosis, lupus, polymyositis and rheumatoid rthritis. Overlap syndrome ormixed connective tissue disease		Radulescu D, Pripon S, Ciovicescu F, Constantea NA.	Acta Reumatol Port. 2007 Jul-Sep;32(3):292-7
23	A woman with multiple autoimmune diseases: pathologic correlations and complications		Manfredi R	Gac Med Mex. 2009 Jul-Aug;145(4):347-8.
24	Acetylcholine receptor antibodies in myasthenia gravis are associated with greater risk of diabetes and thyroid disease		Toth C, McDonald D, Oger J, Brownell K.	Acta Neurol Scand. 2006 Aug;114(2):124-32
25	Autoimmune hepatitis-autoimmune cholangitis overlap syndrome and autoimmune thyroiditis in a patient with celiac disease		Ozaslan E.	Eur J Gastroenterol Hepatol. 2009 Jun;21(6):716-8.
26	Autoimmune hepatitis-primary sclerosing cholangitis overlap syndrome complicated by Crohn's disease		Malik TA, Gutierrez AM, McGuire B, Zarzour JG, Mukhtar F, Bloomer J.	Digestion. 2010;82(1):24-6. Epub 2010 Feb 17.
27	Autoimmune liver disease associated with celiac disease in childhood a multicenter study		Caprai S, Vajro P, Ventura A, Sciveres M, Maggiore G; SIGENP Study Group for Autoimmune Liver Disorders in Celiac Disease.	Clin Gastroenterol Hepatol. 2008 Jul;6(7):803-6
28	Coeliac disease in autoimmune liver disease a cross-sectional study and a systematic review		Mirzaagha F, Azali SH, Islami F, Zamani F, Khalilipour E, Khatibian M, Malekzadeh R.	Dig Liver Dis. 2010 Sep;42(9):620-3.
29	Coexistence of five autoimmune diseases diagnostic and therapeutic difficulties.		Wielosz E, Majdan M, Zychowska I, Jeleniewicz R.	Rheumatol Int. 2008 Jul;28(9):919-23.
30	Concurrence of myasthenia gravis, polymyositis, thyroiditis and eosinophilia in a patient with type B1 thymoma		Inoue M, Kojima Y, Shinde A, Satoi H, Makino F, Kanda M, Shibasaki H.	Rinsho Shinkeigaku. 2007 Jul;47(7):423-8.
31	Concurrent immune thrombocytopenic purpura and Guillain-Barre syndrome in a patient with Hashimoto's thyroiditis		Kohli RS, Bleibel W, Bleibel H.	Am J Hematol. 2007 Apr;82(4):307-8.
32	Lessons from a patient with an unusual hepatic overlap syndrome		Sander LE, Koch A, Gartung C, Winograd R, Donner A, Wellmann A, Trautwein C, Geier A.	Nat Clin Pract Gastroenterol Hepatol. 2007 Nov;4(11):635-40
33	Overlap Syndrome and Connective Tissue Diseases		Heurgué-Berlot A, Bresson-Hadni S, Bernard-Chabert B, Thiéfin G.	Dig Dis Sci. 2011 Jan;56(1):268-9.
34	Overlap syndrome autoimmune hepatitis and primary biliary cirrhosis associated with antiphospholipid syndrome		Targońska-Stepniak B, Majdan M, Suszek D, Laskowska K.	Pol Merkur Lekarski. 2006 Nov;21(125):480-3.
35	Primary biliary cirrhosis (PBC)-CREST overlap syndrome with coexistence of Sjögren's syndrome and thyroid dysfunction		Nakamura T, Higashi S, Tomoda K, Tsukano M, Sugi K.	Clin Rheumatol. 2007 Apr;26(4):596-600
36	Primary biliary cirrhosis autoimmune hepatitis overlap syndrome developing in a patient with systemic lupus erythematosus a case report and review of the literature		González LA, Orrego M, Ramírez LA, Vásquez G.	Lupus. 2011 Jan;20(1):108-11.
37	Primary biliary cirrhosis-autoimmune hepatitis overlap syndrome concomitant with systemic sclerosis, immune thrombocytopenic purpura		Toyoda M, Yokomori H, Kaneko F, Yoshida H, Hoshi K, Takeuchi H, Tahara K, Takahashi A, Kudo T, Motoori T, Ohbu M,Kondo H, Hibi T.	Intern Med. 2009;48(23):2019-23.
38	Screening for associated autoimmune disorders in Polish patients with Addison's disease		Fichna M, Fichna P, Gryczyńska M, Walkowiak J, Zurawek M, Sowiński J.	Endocrine. 2010 Apr;37(2):349-60.
39	Secondary lethal catastrophic antiphospholipid syndrome in 24-years old female patient with overlap syndrome (systemic sclerosis and systemic lupus erythematosus		Ciołkiewicz M, Domysławska I, Kita K, Muklewicz E, Kowal-Bielecka O, Lewandowski B, Sierakowski S.	Pol Merkur Lekarski. 2006 Mar;20(117):337-40.
40	Simultaneous triple organ specific autoantibody profiling in adult patients with type 1 diabetes mellitus and their first degree relatives		Dagdelen S, Hascelik G, Bayraktar M.	Int J Clin Pract. 2009 Mar;63(3):449-56.
41	Systemic sclerosis-polymyositis overlap syndrome accompanied by autoimmune hepatitis and sarcoidosis of mediastinal lymphnodes		Lis-Swiety A, Brzezinska-Wcislo L, Pierzchala E, Wcislo-Dziadecka D.	J Eur Acad Dermatol Venereol. 2006 Jan;20(1):107-8
42	The development of autoimmune hepatitis and primary biliary cirrhosis overlap syndrome during the course of connective tissue diseases report of three cases and review of the literature		Efe C, Ozaslan E, Nasiroglu N, Tunca H, Purnak T, Altiparmak E.	Dig Dis Sci. 2010 Aug;55(8):2417-21
43	Are Individuals With an Autoimmune Disease at Higher Risk of a Second Autoimmune Disorder?	46	Somers EC, Thomas SL, Smeeth L, Hall AJ.	Am J Epidemiol. 2009 Mar 15;169(6):749-55.
44	Additional autoimmune disease found in 33% of patients at type 1 diabetes onset		Triolo TM, Armstrong TK, McFann K, Yu L, Rewers MJ, Klingensmith GJ, Eisenbarth GS, Barker JM.	Diabetes Care. 2011 May;34(5):1211-3.
45	Autoimmune hemolityc anemia concomitant with sequential autoimmune hepatitis-primary biliary cirrhosis overlap syndrome and Hashimoto's thyroiditis: a new entity of autoimmune polyendocrine syndrome		Gentile M, Verta M, Vigna E, Lucia E, Mazzone C, Perugini D, Gentile C, Bisconte MG, Romeo F, Leo P, Betterle C,Morabito F.	J Endocrinol Invest. 2009 Mar;32(3):287-8
46	Hyperparathyroidism in a patient with autoimmune polyglandular syndrome		Pelletier-Morel L, Fabien N, Mouhoub Y, Boitard C, Larger E.	Intern Med. 2008;47(21):1911-5.
47	Multiple autoimmune syndrome: Hashimoto's thyroiditis, coeliac disease and systemic lupus erythematosus		Latif S, Jamal A, Memon I, Yasmeen S, Tresa V, Shaikh S.	J Pak Med Assoc. 2010 Oct;60(10):863-5
48	Pernicious anemia in an adolescent with type 1 diabetes mellitus and hypothyroidism		Carneiro M, Dumont C.	Arch Pediatr. 2009 Apr;16(4):357-9
49	Screening frequency for celiac disease and autoimmune thyroiditis in children and adolescents with type 1 diabetes mellitus--data from a German/Austrian multicentre survey		Fröhlich-Reiterer EE, Hofer S, Kaspers S, Herbst A, Kordonouri O, Schwarz HP, Schober E, Grabert M, Holl RW; DPV-Wiss Study Group	Pediatr Diabetes. 2008 Dec;9(6):546-53
50	Type 1 diabetes associated with Hashimoto's thyroiditis and		Nagy KH, Lukacs K, Sipos P, Hermann R, Madacsy L, Soltesz G.	Pediatr Diabetes. 2010 Dec;11(8):579-82
51	Type 1 diabetes mellitus associated with autoimmune thyroid disease, celiac disease and familial Mediterranean fever case report		Baş F, Kabataş-Eryilmaz S, Günöz H, Darendeliler F, Küçükemre B, Bundak R, Saka N.	Turk J Pediatr. 2009 Mar-Apr;51(2):183-6.
52	Vitiligo associated with other autoimmune diseases polyglandular autoimmune syndrome types 3B+C and 4		Amerio P, Tracanna M, De Remigis P, Betterle C, Vianale L, Marra ME, Di Rollo D, Capizzi R, Feliciani C, Tulli A.	Clin Exp Dermatol. 2006 Sep;31(5):746-9.
53	A case of autoimmune polyglandular syndrome-related Parkinsonian syndrome that required differentiation from multiple system atrophy		Kobayashi M, Nanri K, Tanaka N, Hasegawa A, Taguchi T, Saito K.	Rinsho Shinkeigaku. 2010 Oct;50(10):704-9
54	Atypical celiac disease in a patient with type 1 diabetes mellitus and Hashimoto's thyreoiditis		Schreiber FS, Ziob T, Vieth M, Elsbernd H.	Dtsch Med Wochenschr. 2011 Jan;136(3):82-5.
55	Autoimmune polyendocrine syndrome type 2 associated with autoimmune hypophysitis and coeliac disease		Hrubisková K, Jackuliak P, Vanuga P, Pura M, Payer J.	Vnitr Lek. 2010 Nov;56(11):1169-76.
56	Multiple autoimmune syndrome in a Japanese patient with pemphigus foliaceus		Furuichi M, Makino T, Hara H, Matsui K, Shimizu T.	Eur J Dermatol. 2010 May-Jun;20(3):396-7
57	Addison's disease secondary to connective tissue diseases: a report of six cases		Zhang ZL, Wang Y, Zhou W, Hao YJ.	Rheumatol Int. 2009 Apr;29(6):647-50.
58	Membrane autoantibodies in systemic lupus erythematosus: a case of autoimmune hemolytic anemia, antiphospholipid antibodies, and transient acquired activated protein C resistance		Staropoli JF, Van Cott EM, Makar RS.	Transfusion. 2008 Nov;48(11):2435-41
59	Rituximab in the treatment of three coexistent neurological autoimmune diseases chronic inflammatory demyelinating polyradiculoneuropathy, Morvan syndrome and myasthenia gravis		Sadnicka A, Reilly MM, Mummery C, Brandner S, Hirsch N, Lunn MP.	J Neurol Neurosurg Psychiatry. 2011 Feb;82(2):230-2
60	Transverse myelitis and polymyositis associated with antiphospholipid antibody syndrome		Mori A, Nodera H, Nakane S, Kaji R.	Clin Neurol Neurosurg. 2010 Oct;112(8):713-6.
61	Crohn's disease, primary sclerosing cholangitis and antiphospholipid syndrome: an uncommon association		Romdhane H, Karoui S, Serghini M, Boubaker J, Filali A.	Tunis Med. 2009 May;87(5):349-51
62	A case of anti-AQP4 antibody-positive recurrent myelitis overlapped with autoimmune disorders including incomplete CREST syndrome revealed multiple discontinuous cord lesions		Takahashi M, Nagata R, Ozaki A, Kaneko S, Saiki H, Matsumoto S.	Rinsho Shinkeigaku. 2009 Feb-Mar;49(2-3):115-8.
63	Acute transverse myelitis as part of the catastrophic antiphospholipid syndrome in a systemic lupus erythematosus patient		Tristano AG.	Neurologia. 2004 Dec;19(10):774-5.
64	Lupus-related myelopathy: report of three cases and review of the literature		Provenzale J, Bouldin TW.	J Neurol Neurosurg Psychiatry. 1992 Sep;55(9):830-5.
65	Acute transverse myelopathy after posterior cervical decompressive laminectomy and fusion		Seitz PA, Alfery DD, Robinette C.	Anesth Analg. 2001 May;92(5):1254-6
66	Antiphospholipid antibodies and antiphospholipid syndrome in 57 children and adolescents with systemic lupus erythematosus		Campos LM, Kiss MH, D'Amico EA, Silva CA.	Lupus. 2003;12(11):820-6.
67	Devic's syndrome in systemic lupus erythematosus and probable antiphospholipid syndrome		Ferreira S, Marques P, Carneiro E, D'Cruz D, Gama G.	Rheumatology (Oxford). 2005 May;44(5):693-5.
68	Transverse myelitis occurring in association with primary biliary cirrhosis and Sjogren's syndrome		Anantharaju A, Baluch M, Van Thiel DH.	Dig Dis Sci. 2003 Apr;48(4):830-3
69	Sjögren's syndrome with primary biliary cirrhosis, complicated by transverse myelitis and malignant lymphoma		Wakatsuki T, Miyata M, Shishido S, Suzuki T, Ohira H, Kokubun M, Sato Y, Yamamoto T, Kasukawa R.	Intern Med. 2000 Mar;39(3):260-5.
70	Primary biliary cirrhosis, Sjogren's syndrome, and transverse myelitis		Rutan G, Martinez AJ, Fieshko JT, Van Thiel DH.	Gastroenterology. 1986 Jan;90(1):206-10
71	Co-existing sarcoidosis, systemic lupus erythematosus and the antiphospholipid antibody syndrome: case reports and discussion from the Brigham and Women's Hospital Lupus Center		Wesemann DR, Costenbader KH, Coblyn JS.	Lupus. 2009 Mar;18(3):202-5
72	Multiple autoimmune syndrome in a patient with pemphigus vulgaris: a new combination		Khaled A, Fazaa B, Mrabet N, Zeglaoui F, Kamoun MR.	Tunis Med. 2008 Jun;86(6):595-7.
73	Systemic lupus erythematosus, celiac disease and antiphospholipid antibody syndrome a rare association		Gupta D, Mirza N.	Rheumatol Int. 2008 Sep;28(11):1179-80
74	Symptoms and signs of polymositis, systematic lupus erythematosus and antiphospholipid syndrome follow consecutively		Zubrzycka-Sienkiewicz A, Wagner T, Zabek J, Palacz A.	Pol Arch Med Wewn. 2008;118 Suppl:80-4.
75	Acquired generalised neuromyotonia, cutaneous lupus erythematosus and alopecia areata in a patient with myasthenia gravis		O'Sullivan SS, Mullins GM, Neligan A, McNamara B, Galvin RJ.	Clin Neurol Neurosurg. 2007 May;109(4):374-5.
76	Autoimmune polyendocrinopathy type II in a Chinese patient		Tsang CC, Ko GT, Wong KK, Chan HS, Yu AW.	Hong Kong Med J. 2006 Oct;12(5):385-7.
77	Scleroderma with traces of disseminated lupus erythematosus associated with Hashimoto's thyroiditis and papillary carcinoma of the thyroid gland		Sánchez de Rivera JM, Barbado Hernández FJ, Vázquez Rodríguez JJ, Gil Aguado A, García Puig J, Viguer García-Moreno JM.	Med Clin (Barc). 1979 Nov 10;73(8):342-6
78	Systemic lupus erythematosus in a patient with Hashimoto's thyroiditis and pernicious anaemia		Hamilton DV.	J R Soc Med. 1978 Feb;71(2):147-9.
79	Problems in diagnosis and treatment of lupus psychosis. Report of a patient with systemic lupus erythematosus, Hashimoto's thyroiditis, and Sjögren's syndrome		Denko JD.	Am J Psychother. 1977 Jan;31(1):125-37.
80	Hereditary complement (C6) deficiency associated with systemic lupus erythematosus, Sjögren's syndrome and hyperthyroidism		Trapp RG, Mooney E, Coleman TH, Forristal J, Herman JH.	J Rheumatol. 1987 Oct;14(5):1030-3.
81	Headache in a case of Rhupus syndrome		Chowdhury SR, Majumder S, Chakraborty PP, Mandal SK, Bandyopadhyay R, Bandyopadhyay D, Chatterjee A, Basu K.	Headache. 2008 Jan;48(1):155-8.
82	Anti-centromere autoantibody in a patient evolving from a lupus/Sjögren's overlap to the CREST variant of scleroderma		Ford AL, Kurien BT, Harley JB, Scofield RH.	J Rheumatol. 1998 Jul;25(7):1419-24.
83	Primary sclerosing cholangitis occurring in a patient with systemic lupus erythematosus and diabetes mellitus		Alberti-Flor JJ, Jeffers L, Schiff ER	Am J Gastroenterol. 1984 Nov;79(11):889-91.
84	Sarcoidosis accompanied by systemic lupus erythematosus and autoimmune hepatitis		Nakayama S, Mukae H, Morisaki T, Sakamoto N, Ohba K, Abe K, Takeshima F, Mizuta Y, Ida H, Ozono Y, Kohno S.	Intern Med. 2007;46(19):1657-61.
85	Systemic lupus erythematosus related recurrent transverse myelitis in a patient with myasthenia gravis and multiple sclerosis		Tola MR, Casetta I, Granieri E, Caniatti LM, Monetti VC, Pascarella R.	Eur Neurol. 1996;36(5):327-8.
86	A pair of monozygotic twins who are concordant for myasthenia gravis but became discordant for systemic lupus erythematosus post-thymectomy		Grinlinton FM, Lynch NM, Hart HH.	Arthritis Rheum. 1991 Jul;34(7):916-9
87	Association of the acral type of pustular psoriasis, Sjögren's syndrome, systemic lupus erythematosus, and Hashimoto's thyroiditis		Kobayashi T, Naka W, Harada T, Nishikawa T.	J Dermatol. 1995 Feb;22(2):125-8
88	M scleroderma (with systemic progressive sclerosis) associated with clinical and biological signs of dermatomyositis and lupus erythematosu		Grupper C, Durepaire RM, Eisenmann D, Briche R.	Bull Soc Fr Dermatol Syphiligr. 1972;79(3):219-20
89	Systemic lupus erythematosus in association with ulcerative colitis: related autoimmune diseases		Stevens HP, Ostlere LS, Rustin MH.	Br J Dermatol. 1994 Mar;130(3):385-9.
90	Triple autoimmune association in man: Sjogren's syndrome, systemic lupus erythematosus and primary biliary cirrhosis		Cabanillas Núñez Y, Rodríguez Vidigal FF, Soria Corón R, Díaz Rodríguez E, Bueno Jiménez C.	An Med Interna. 1996 Aug;13(8):407.
91	Systemic lupus erythematosus and/or relapsing polychondritis with catastrophic antiphospholipid síndrome		Roux M, Fabre M, Ninet J.	Rev Med Interne. 2004 Jan;25(1):74-7.
92	Paraneoplastic pemphigus: a case of long-term survival associated with systemic lupus erythematosus and polymyositis		Mascaró JM Jr, Ferrando J, Solé MT, Alsina M, Nousari HC, Anhalt GJ, Font J, Mascaró JM.	Dermatology. 1999;199(1):63-6
93	Transverse myelitis: a complication of systemic lupus erythematosus that is associated with the antiphospholipid síndrome		Smyth AE, Bruce IN, McMillan SA, Bell AL.	Ulster Med J. 1996 May;65(1):91-4.
94	Papulonodular mucinosis and late-onset systemic lupus erythematosus associated with Hashimoto's thyroiditis and Sjogren's syndrome		Galofré J, Bielsa I, Casademont J, Herrero C, Cardellach F.	Rev Clin Esp. 1989 May;184(8):446-7.
95	Systemic lupus erythematosus, Sjögren's syndrome, and purpura in a patient with coeliac disease		Peña AS.	Neth J Med. 1987 Dec;31(5-6):305-7.
96	Thyroid disease and multiple autoimmune syndromes. Clinical and immunogenetic aspects apropos of 11 cases		Bouchou K, André M, Cathébras P, Klisnick A, Schmidt J, Aumaître O, Rousset H.	Rev Med Interne. 1995;16(4):283-7.
97	Pernicious anemia, Hashimoto's thyroiditis and Sjögren's in a woman with SLE and autoimmune hemolytic anemia		Feld S, Landau Z, Gefel D, Green L, Resnitzky P.	J Rheumatol. 1989 Feb;16(2):258-9.
98	Síndrome poliglandular autoinmune endocrino tipo III asociado con lupus eritematoso sistémico		Cañas C, Jimenez C, Restrepo J, Rojas J, Cano N, Arteaga J, Iglesias A.	Acta méd. Colomb.1998;23(2):90-4.
99	Demonstration of antinuclear antibodies in epidermis of patients with progressive systemic sclerosis, systemic lupus erythematosus and dermatomyositis		Lamas Robles C, Mejía Arreguín S, Orozco Medina JH, González Mendoza A.	Rev Invest Clin. 1984 Apr-Jun;36(2):115-9.
100	Urticarial vasculitis and Jaccoud's arthropathy		Cadena J, Chavarriaga J, Diaz L, Camargo J, Anaya J.	Rev.Colomb.Reumatol.2003;10(1):55-9.
101	Large vessel vasculitis and occlusion associated to antiphospholipid antibodies in systemic lupus erythematosus		Klumb EM, Lederman R, Guimaraes SJ, Goldfarb M, Assad JEM, Leite NH.	Rev. bras. Reumatol.1993;33(1):42-5.
102	Factors influencing polyautoimmunity in systemic lupus erythematosus	18	Rojas-Villarraga A, Toro CE, Espinosa G, Rodríguez-Velosa Y, Duarte-Rey C, Mantilla RD, Iglesias-Gamarra A, Cervera R, Anaya JM.	Autoimmun Rev. 2010 Feb;9(4):229-32.
103	Three-year observation of a myastenic syndrome concurrent with other autoimmune syndromes in a patient with thymoma		Hausmanowa-Petrusewicz I, Chorzelski T, Strugalska H.	J Neurol Sci. 1969 Sep-Oct;9(2):273-84.
104	Overlap syndromes in the context of shared autoimmunity		Rodríguez-Reyna TS, Alarcón-Segovia D.	Autoimmunity. 2005 May;38(3):219-23.
105	Mixed types of chronic active hepatitis and primary biliary cirrhosis associated with the anti-phospholipid antibody syndrome: a case report		Saeki R, Kaneko S, Terasaki S, Unoura M, Ogino H, Wakabayashi T, Kawara S, Nakanuma Y, Kobayashi K.	Hepatogastroenterology. 1993 Oct;40(5):499-501
106	Prednisone use in concurrent autoimmune diseases		Harati Y, Patten BM.	Arch Neurol. 1979 Feb;36(2):103-6.
107	Schmidt's syndrome in a child with diabetes mellitus		Nelson RP, Traisman HS, Deddish RB, Green OC.	Diabetes Care. 1978 Jan-Feb;1(1):37-9.
108	Concurrent features of cutaneous lupus erythematosus and pemphigus erythematosus following myasthenia gravis and thym		Cruz PD Jr, Coldiron BM, Sontheimer RD.	J Am Acad Dermatol. 1987 Feb;16(2 Pt 2):472-80.
109	Intergenerational anticipation of disease onset in patients with multiple autoimmune syndrome		Giardino G, Aloj G, Cirillo E, Capalbo D, Maio F, Salerno M, Franzese A, Pignata C.	Diabetes Res Clin Pract. 2011 Aug 16
110	Autoimmune thyroid disease is associated with a diagnosis of secondary Sjögren's syndrome in familial systemic lupus		Scofield RH, Bruner GR, Harley JB, Namjou B.	Ann Rheum Dis. 2007 Mar;66(3):410-3.
111	Chronic inflammatory demyelinating polyneuropathy followed by systemic lupus erythematosus and Sjögren syndrome: a case report		Hatano T, Fukuda M, Shiotsuki H, Miwa H, Urabe T, Mizuno Y.	Rinsho Shinkeigaku. 2006 Mar;46(3):203-9.
112	Rheumatic diseases in patients with myasthenia gravis. An epidemiological and clinical investigation		Oosterhuis HJ, de Haas WH.	Acta Neurol Scand. 1968;44(2):219-27
113	Polyautoimmune syndrome in common variable immunodeficiency.		Tanus T, Levinson AI, Atkins PC, Zweiman B.	J Intern Med. 1993 Nov;234(5):525-7
114	Polyautoimmunity in a young woman	30	Sheehan NJ, Stanton-King K.	Br J Rheumatol. 1993 Mar;32(3):254-6.
115	Sjogren's syndrome in SLE: Part 2. An examination of the clinical significance of Sjogren's syndrome by comparison of its frequency in typical and atypical forms of SLE, overlapsyndromes and scleroderma		Grennan DM, Ferguson M, Ghobarey AE, Williamson J, Dick WC, Buchanan WW.	N Z Med J. 1977 Oct 26;86(598):376-9.
116	A case of mixed connective tissue disease developed into overlapsyndrome of progressive systemic sclerosis, systemic lupus erythematosus, polymyositis and Sjögren's syndrome		Akiyama Y, Suzuki T, Tanaka M, Kobayashi K, Kagiri T, Ishibashi T, Kitagawa H, Imai F, Hara K, Doi Y	Arerugi. 1990 Jun;39(6):542-7.
117	A case of overlap syndrome of PSS, SLE and Sjögren syndrome treated by cyclosporin A: an improvement of sclerosis of the skin		Kume A, Ueda K, Sano S, Funai T, Kobayashi Y, Hashimoto K, Yoshikawa K.	Nihon Hifuka Gakkai Zasshi. 1989 Oct;99(11):1191-6.
118	Secondary amyloidosis associated with overlap syndrome of rheumatoid arthritis, progressive systemic sclerosis and polymyositis		Kumagai I, Sasaki T, Takatori K, Shikata K, Ikeda S, Takaoka M, Makino H, Ota Z.	Nihon Naika Gakkai Zasshi. 1989 Sep;78(9):1346-7.
119	Coexistance of autoimmunological diseases with type 1 diabetes mellitus in young patients based on literature and own experience		Otto-Buczkowska E, Jarosz-Chobot P, Minkina-Pedras M, Deja G, Kalina-Faska B.	Przegl Lek. 2008;65(3):140-4.
120	Seroprevalence of autoimmune thyroiditis and celiac disease in children with insulin-dependent diabetes mellitus in the Thrace region of Turkey		Soyucen E, Yilmaz S, Çeltık C, Vatansever U, Öner N, Karasalıhoğlu S.	Turk J Gastroenterol. 2010 Sep;21(3):231-5.
121	Thyroiditis and gluten intolerance: extrapancreatic auto-immune diseases associated with type 1 diabetes		Faesch S, Jennane F, Izembart I, Chatenoud L, Taupin P, Martin D, Polak M, Robert JJ.	Arch Pediatr. 2007 Jan;14(1):24-30
122	Scleroderma, thyroiditis, and myasthenia gravis: study of a case.		Werneck AL, Checcacci-Balod T, Tuma G.	Arq Neuropsiquiatr. 1993 Dec;51(4):549-53.
123	Sjögren's syndrome, primary biliary cirrhosis and overlap with scleroderma symptoms		Czirják L, Zeher M, Nagy Z, Szegedi G.	J Intern Med. 1993 May;233(5):427-8.
124	The evolution of a case of overlap syndrome with systemic sclerosis, rheumatoid arthritis and systemic lupus erythematosus		Gendi N, Gordon T, Tanner SB, Black CM.	Br J Rheumatol. 1992 Nov;31(11):783-6.
125	A rare case of cardiac sarcoidosis in a patient with progressive systemic sclerosis, Sjogren's syndrome, and polymyositis		Hosoya N, Mimura T, Enokawa Y, Mizuno T, Hamasaki K, Matsuyama T, Matsuhashi N, Yotsumoto H, Yazaki Y.	Intern Med. 1995 Dec;34(12):1164-7.
126	Primary biliary cirrhosis (PBC)-CREST (calcinosis, Raynaud's phenomenon, esophageal dysfunction, sclerodactyly and telangiectasia) overlap syndrome complicated by Sjögren's syndrome and arthritis		Ito M, Kojima T, Miyata M, Saka M, Kokubun M, Ohira H, Ishikawa H, Kuroda M, Sato Y, Takagi T, et al.	Intern Med. 1995 May;34(5):451-4.
127	Primary biliary cirrhosis (PBC)-CREST overlap syndrome complicated with Sjögren's síndrome		Akiyama Y, Suzuki T, Tanaka M, Fujimaki T, Asaoka T, Kobayashi K, Ohno S, Imai F, Matuo H.	Ryumachi. 1997 Feb;37(1):42-7.
128	Cardiac valvular disease in scleroderma and systemic lupus erythematosus/scleroderma overlap associated with antiphospholipid antibodies		Penmetcha M, Rosenbush SW, Harris CA.	J Rheumatol. 1996 Dec;23(12):2171-4.
129	A juvenile case of overlap syndrome of systemic lupus erythematosus and polymyositis, later accompanied by systemic sclerosis with the development of anti-Scl 70 and anti-Ku antibodies		Nitta Y, Muramatsu M.	Pediatr Dermatol. 2000 Sep-Oct;17(5):381-3.
130	A case of Sjögren's syndrome complicated by polymyositis and sarcoidosis with HLA-B7 and DR 8: common causes of susceptibility for these diseases		Koarada S, Uchida M, Tada Y, Ushiyama O, Suzuki N, Ohta A, Nagasawa K.	Nihon Rinsho Meneki Gakkai Kaishi. 2000 Apr;23(2):141-7
131	Diarrhea in a 49-year old female with overlap syndrome. Celiac disease		Noval Menéndez J, Nuño Mateo FJ, Gallo Alvaro C, Fuente Martín E.	Rev Clin Esp. 2001 Dec;201(12):725-6.
132	Anti-Ku antibody-positive scleroderma-dermatomyositis overlap syndrome developing Graves' disease and immune thrombocytopenic purpura		Kamei N, Yamane K, Yamashita Y, Nakanishi S, Watanabe H, Fujikawa R, Hiyama K, Ishioka S, Mendoza C, Kohno N.	Intern Med. 2002 Dec;41(12):1199-203.
133	Fatal scleroderma renal crisis caused by gastrointestinal bleeding in a patient with scleroderma, Sjögren's syndrome and primary biliary cirrhosis overlap		Szigeti N, Fábián G, Czirják L.	J Eur Acad Dermatol Venereol. 2002 May;16(3):276-9.
134	Dermatomyositis-scleroderma overlap syndrome presenting as autoimmune haemolytic anaemia.		Andrews J, Hall MA.	Rheumatology (Oxford). 2002 Aug;41(8):956-8.
135	Antiphospholipid and antisynthetase syndrome in a patient with polymyositis-rheumatoid arthritis overlap		Ponyi A, Constantin T, Dankó K.	Clin Rheumatol. 2004 Aug;23(4):371-2.
136	PBC-AIH overlap syndrome with concomitant ITP and Hashimoto's disease with positivity for anti-centromere antibody		Arakawa Y, Amaki S, Miyakawa H, Sakai T, Gotou I, Tanaka N, Moriyama M, Iwasaki A, Sugitani M, Arakawa Y.	J Gastroenterol. 2004;39(5):490-5.
137	Les syndromes auto-immuns multiples (SAM)	3	Humbert P, Dupond JL.	Ann Med Interne (Paris). 1988;139(3):159-68.
138	Addisonian pernicious anemia with positive antiglobulin tests. A multiple autoimmune disease síndrome	2	Pirofsky B, Vaughn M.	Am J Clin Pathol. 1968 Oct;50(4):459-66.
139	Bullous pemphigoid and multiple autoimmune diseases. Alopecia universalis, bullous pemphigoid, hypothyroidism, rheumatoid arthritis, and neutropenia in one patient		Lynfield YL, Green K, Gopal R.	J Am Acad Dermatol. 1983 Aug;9(2):257-61.
140	Scleritis and multiple systemic autoimmune manifestations in chronic natural killer cell lymphocytosis associated with elevated TCRalpha/beta+CD3+CD4-CD8- double-negative T cells		Yeh S, Li Z, Sen HN, Lim WK, Gill F, Perkins K, Rao VK, Nussenblatt RB.	Br J Ophthalmol. 2010 Jun;94(6):748-52.
141	Association of a rheumatoid polyarthritis, a secondary Gougerot Sjögren syndrome and perniciousanemia		Hamza S, Hamdi W, Cheour E, Ben Romdane N, Meddeb N, Sahli H, Sellami S.	Tunis Med. 2008 Jan;86(1):100
142	Sjogren's syndrome in a patient with ulcerative colitis and primary sclerosing cholangitis: Case report and review of the literature		Katsanos KH, Saougos V, Kosmidou M, Doukas M, Kamina S, Asproudis I, Tsianos EV	J Crohns Colitis. 2009 Sep;3(3):200-3
